# Supplementary material
Source: PubMed Central journal article supplement (PMC7725929)
Supplement: NIHMS1638952-supplement-1.pdf [file NIHMS1638952-supplement-1.pdf]

## Supplementary Material

A

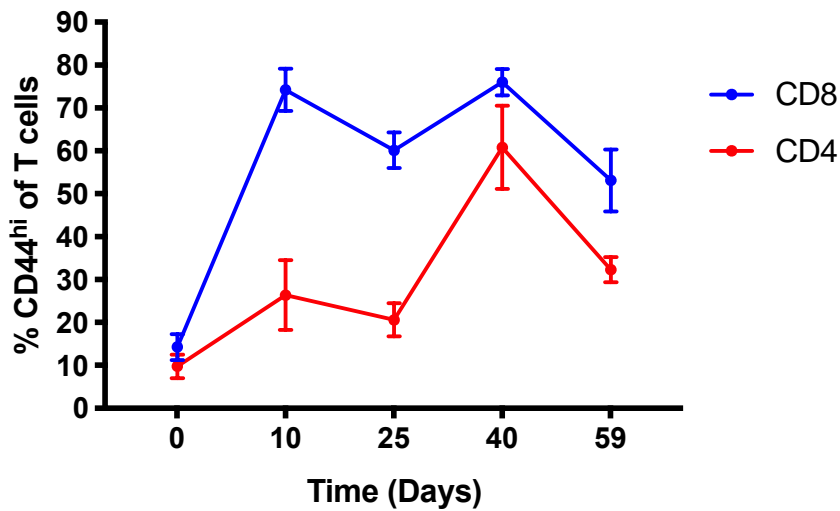

B

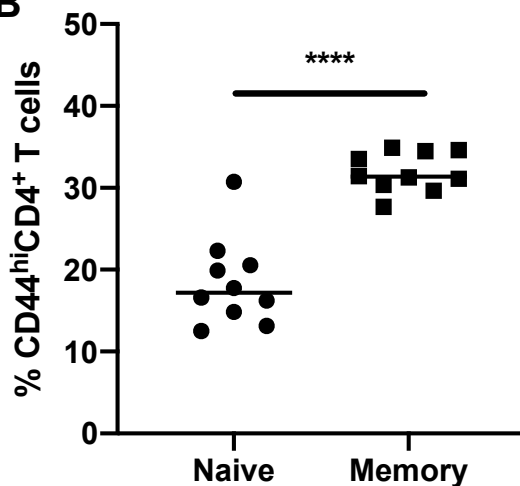

C

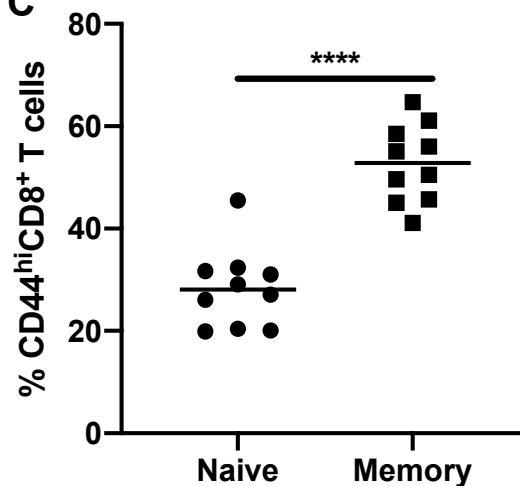

**Fig. S1. Generation and characterization of memory T cells after infection and CD28 expression between memory and naïve mice.** Naïve B6 mice were infected with *Listeria monocytogenes* (LM) and developed a population of memory T cells. Mice were infected with LCMV intraperitoneally 30 days later. The Frequency of memory T cells was assessed on d0, 10, 25, 40, 59 post-LM by flow cytometry. (A) Expansion of CD44<sup>hi</sup>CD4<sup>+</sup> and CD44<sup>hi</sup>CD8<sup>+</sup> T cells in the blood over time following antigen exposure (d0, n=10/group; d10, 25, 40, 59, n=20/group). (B) Summary of frequency of CD44<sup>hi</sup>CD4<sup>+</sup> T cells in naïve mice compared with memory mice (n=10/group) on d59 following infection. (C) Summary of frequency of CD44<sup>hi</sup>CD8<sup>+</sup> T cells in naïve mice compared with memory mice (n=10/group) on d59 following infection. Data expressed as mean  $\pm$  SEM. Groups were compared with the Mann-Whitney nonparametric tests. \*\*\*\*,  $p < 0.0001$ .

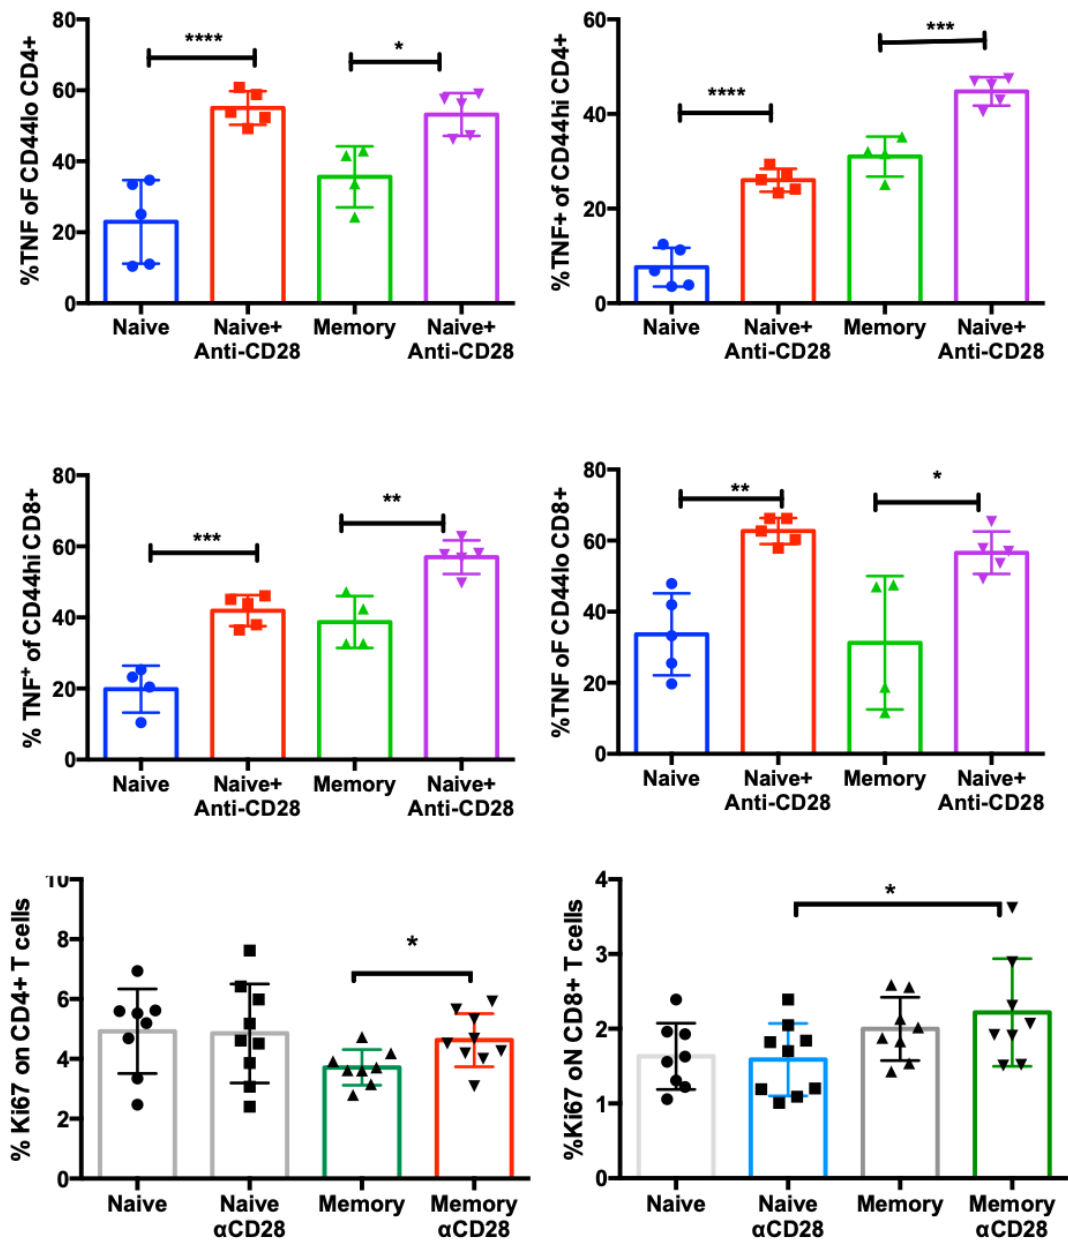

**Fig. S2.  $\alpha$ CD28Ab functions as an agonist to increase cytokine secretion and proliferation in T cells during sepsis.** Memory and naive mice received CLP in the presence or absence of  $\alpha$ CD28Ab. Splenocytes were harvested at 24h post-CLP, restimulated ex vivo with PMA/iono, and stained intracellularly for TNF or Ki67. Data were pooled from two independent experiments. Groups (n=4-9/group) were compared with one-way ANOVA analysis and Turkey multiple comparison test. \*,  $p < 0.05$ , \*\*,  $p < 0.01$  and \*\*\*\*,  $p < 0.0001$ .

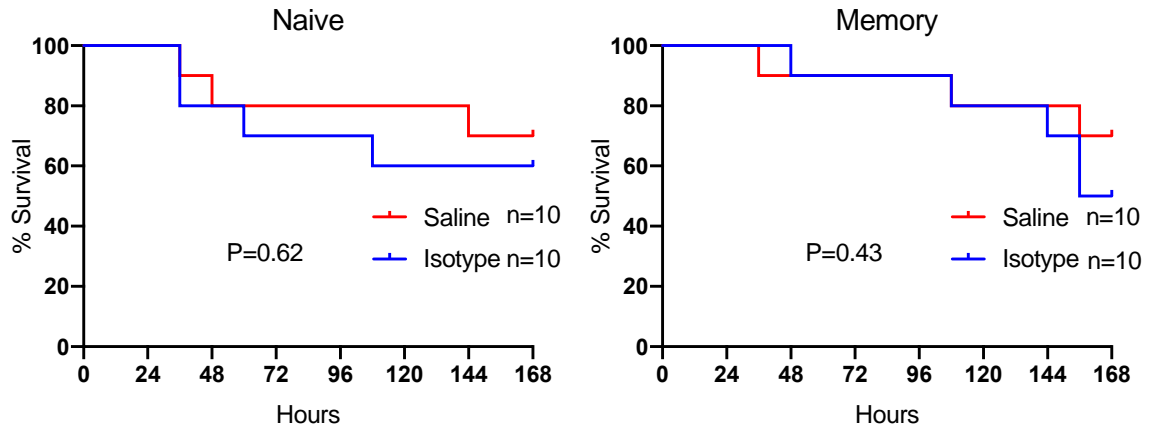

**Fig. S3. Isotype antibody of  $\alpha$ CD28 has no impact on survival in either naïve septic mice or memory septic mice.** Memory and age-matched naïve mice received CLP and were treated with either saline or isotype of  $\alpha$ CD28 antibody (polyclonal Syrian hamster IgG) at d0, 2, 4, 6. All the mice were monitored for 7-day survival. All data were pooled from two independent experiments. The log-rank (Mantel-Cox) test was used to test for significance.

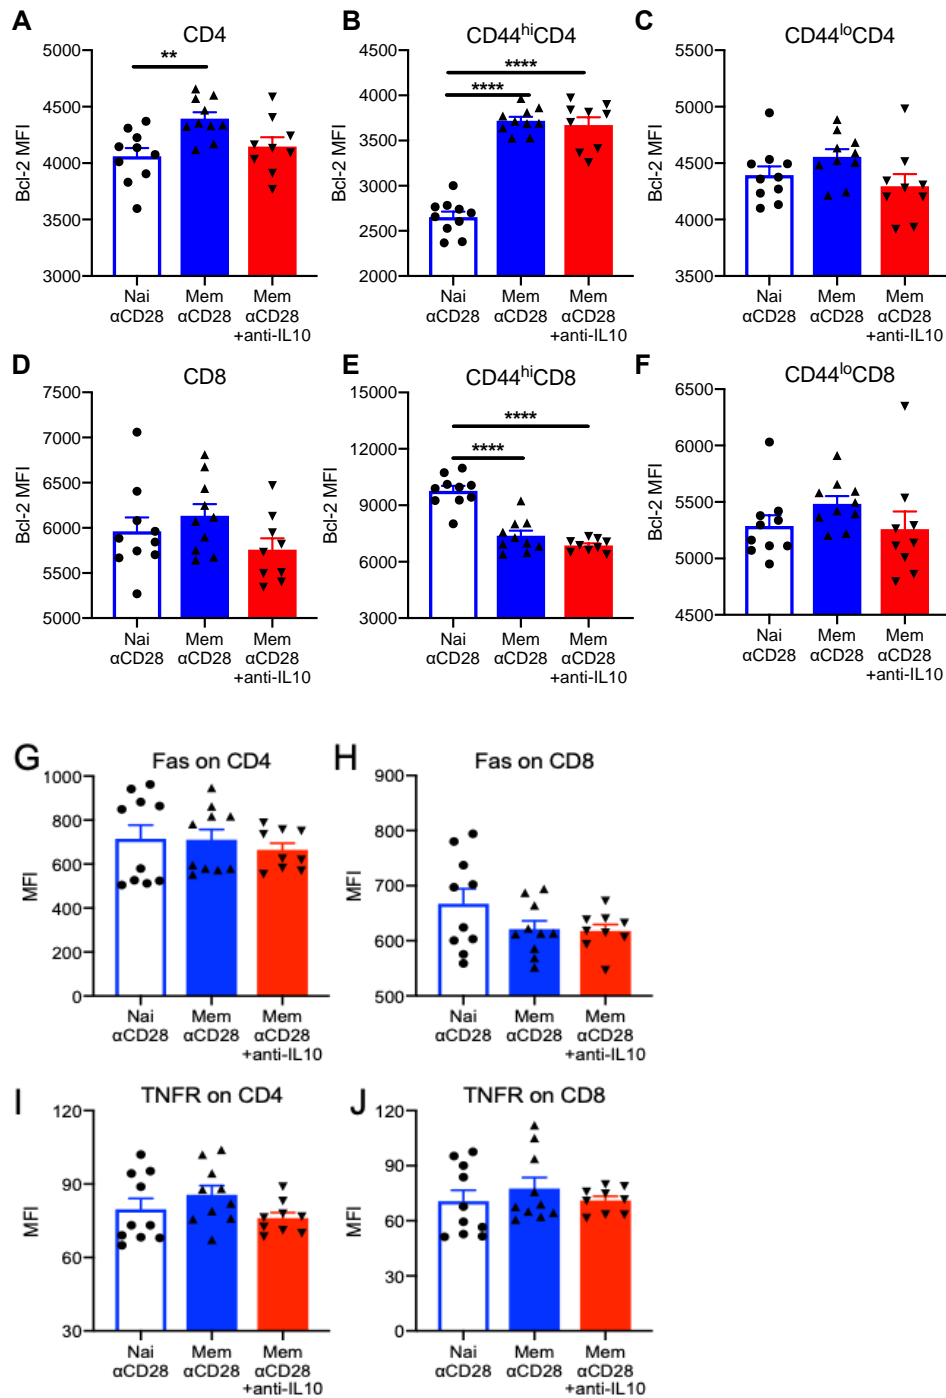

**Fig. S4. Bcl-2, Fas, or TNFR1 on T cells in memory septic mice treated with  $\alpha$ CD28Ab is not affected by blockade of IL-10.** Memory and naïve mice received CLP and  $\alpha$ CD28Ab followed by either anti-IL-10 Ab or isotype Ab. Splenocytes were harvested at 24h post-CLP and stained intracellularly with anti-Bcl-2, anti-Fas, or anti-TNFR. Data were pooled from two independent experiments. Groups (n=9-10/group) were compared with one-way ANOVA analysis and Turkey multiple comparison test. \*\*,  $p < 0.01$  and \*\*\*\*,  $p < 0.0001$ .
